# Supplementary material for: miR-4284 Functions as a Tumor Suppressor in Renal Cell Carcinoma Cells by Targeting Glutamate Decarboxylase 1
Source: MDPI journal article supplement (doi:10.3390/cancers15153888), 2023-07-30
Supplement: s1 [file s1]

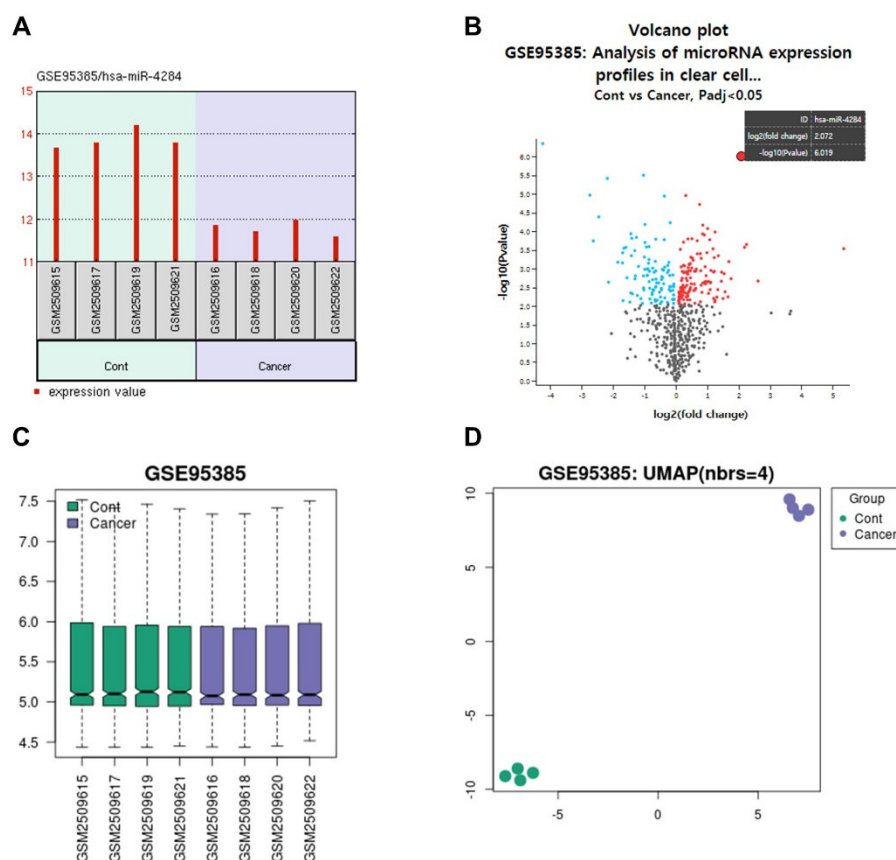

**Supplementary Figure S1.** miR-4284 was down regulated in patients with renal carcinoma from the GEO database (GSE95385). (A) Comparison of the miR-4284 expression level in patients with renal carcinoma compared to that in those without renal carcinoma. (B) Volcano plots of patients with renal carcinoma vs. without renal carcinoma from the GSE95385. (C) Boxplot showing miRNA expression of each group following data normalization from the GSE95385. (D) UMAP test showing miRNA separation from the GSE95385.

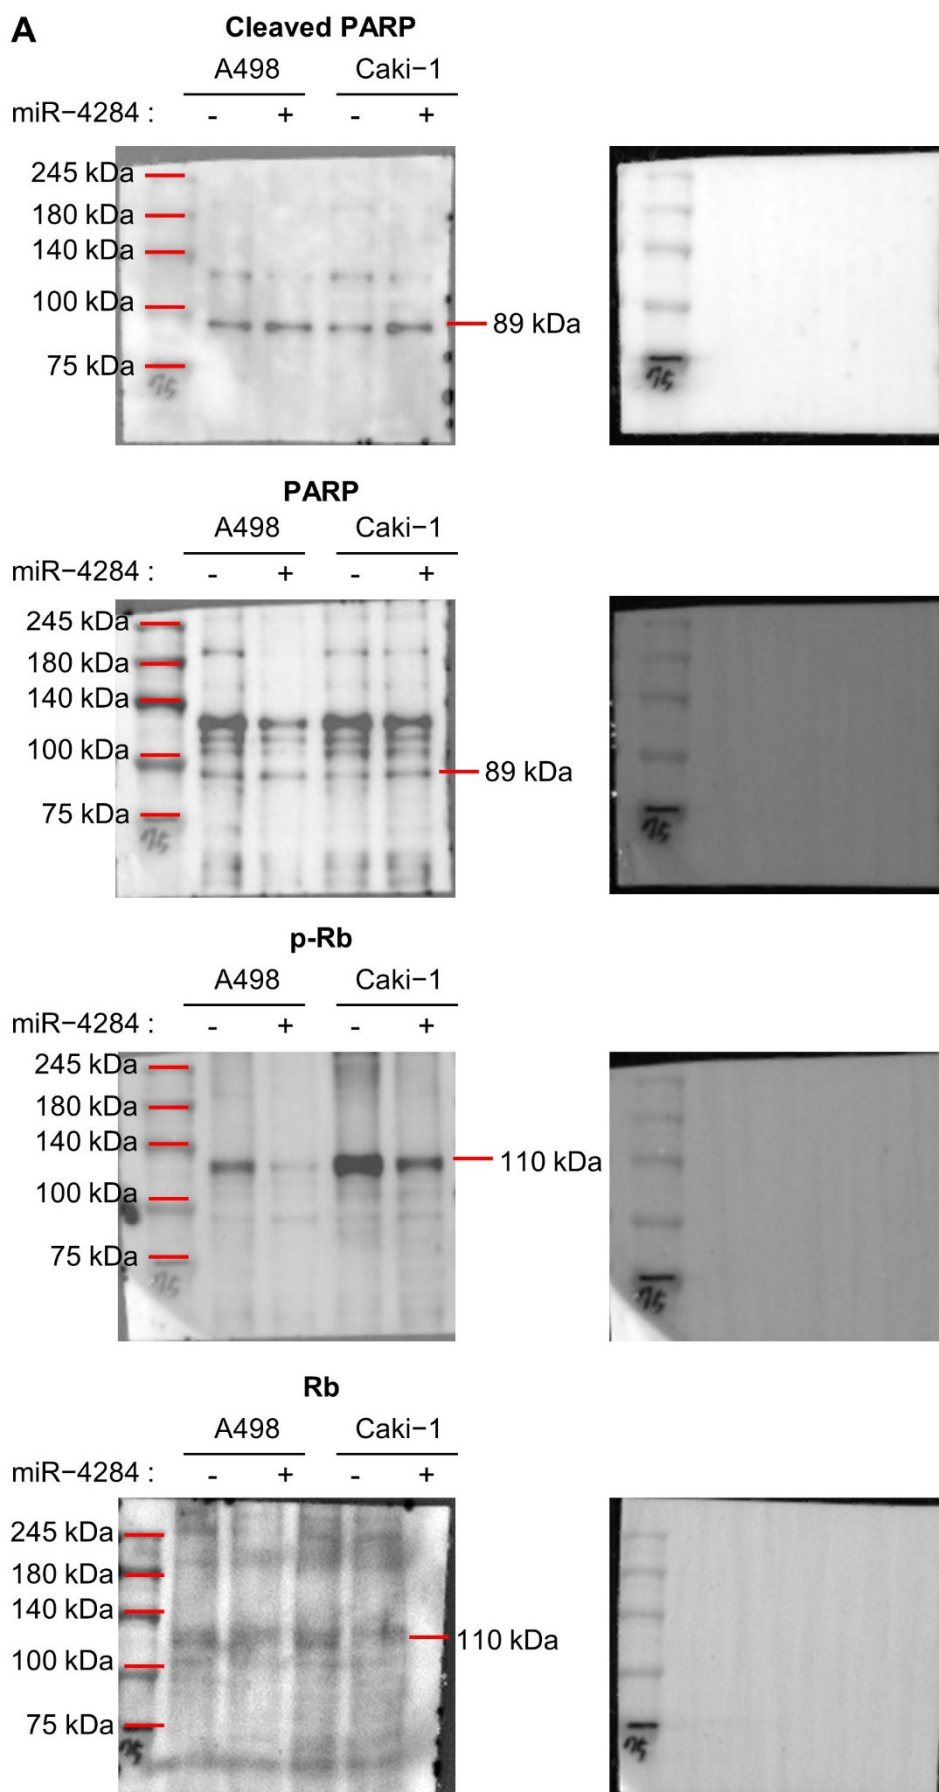

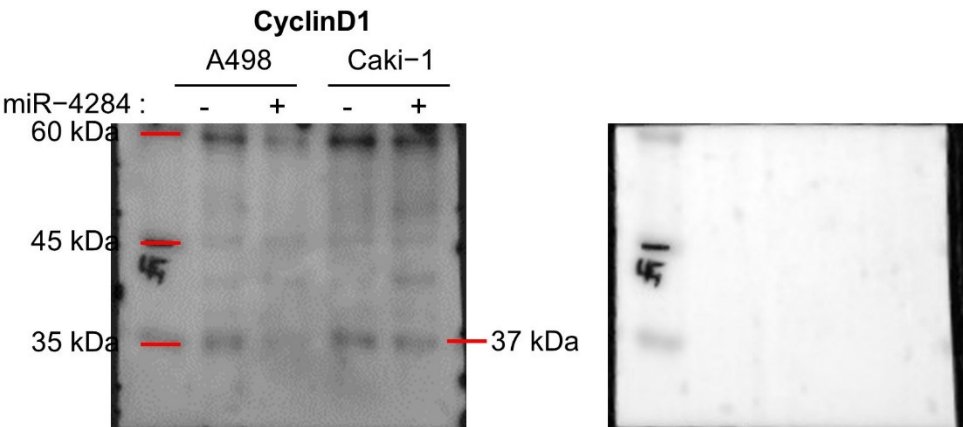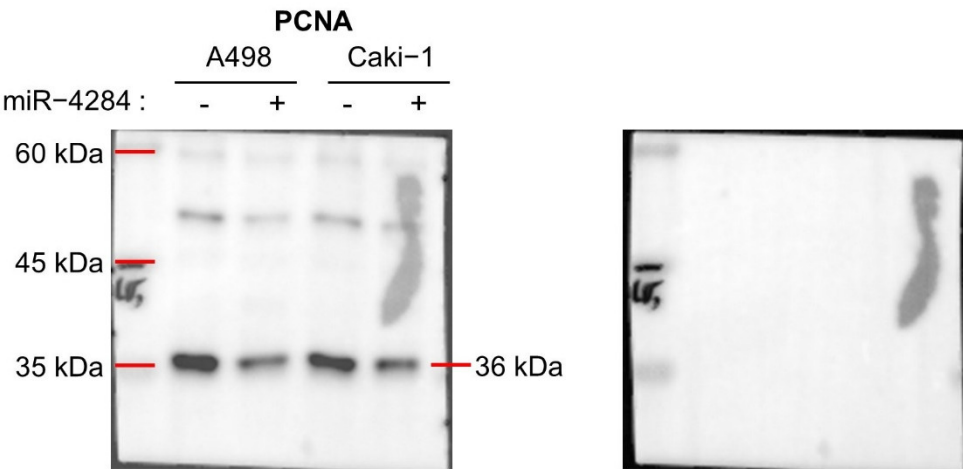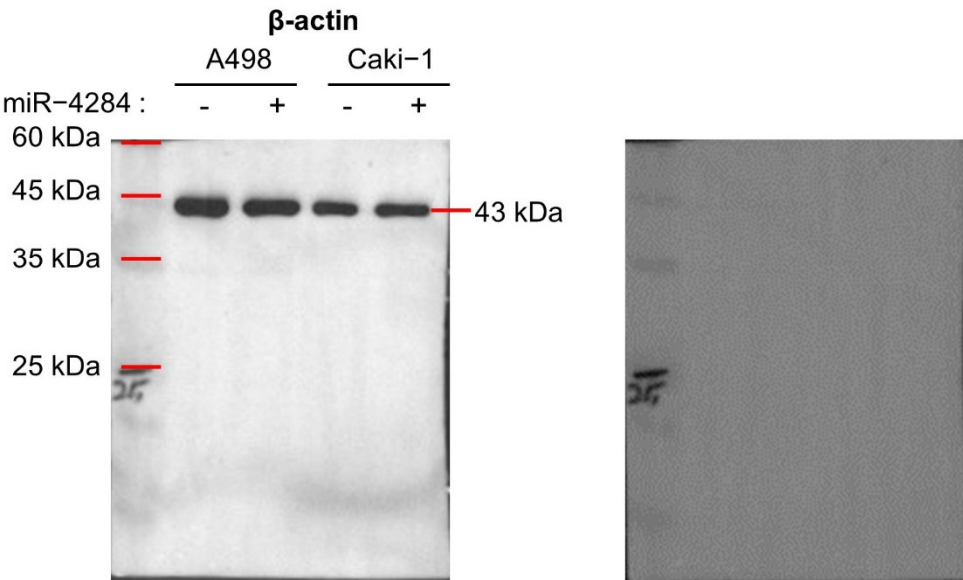

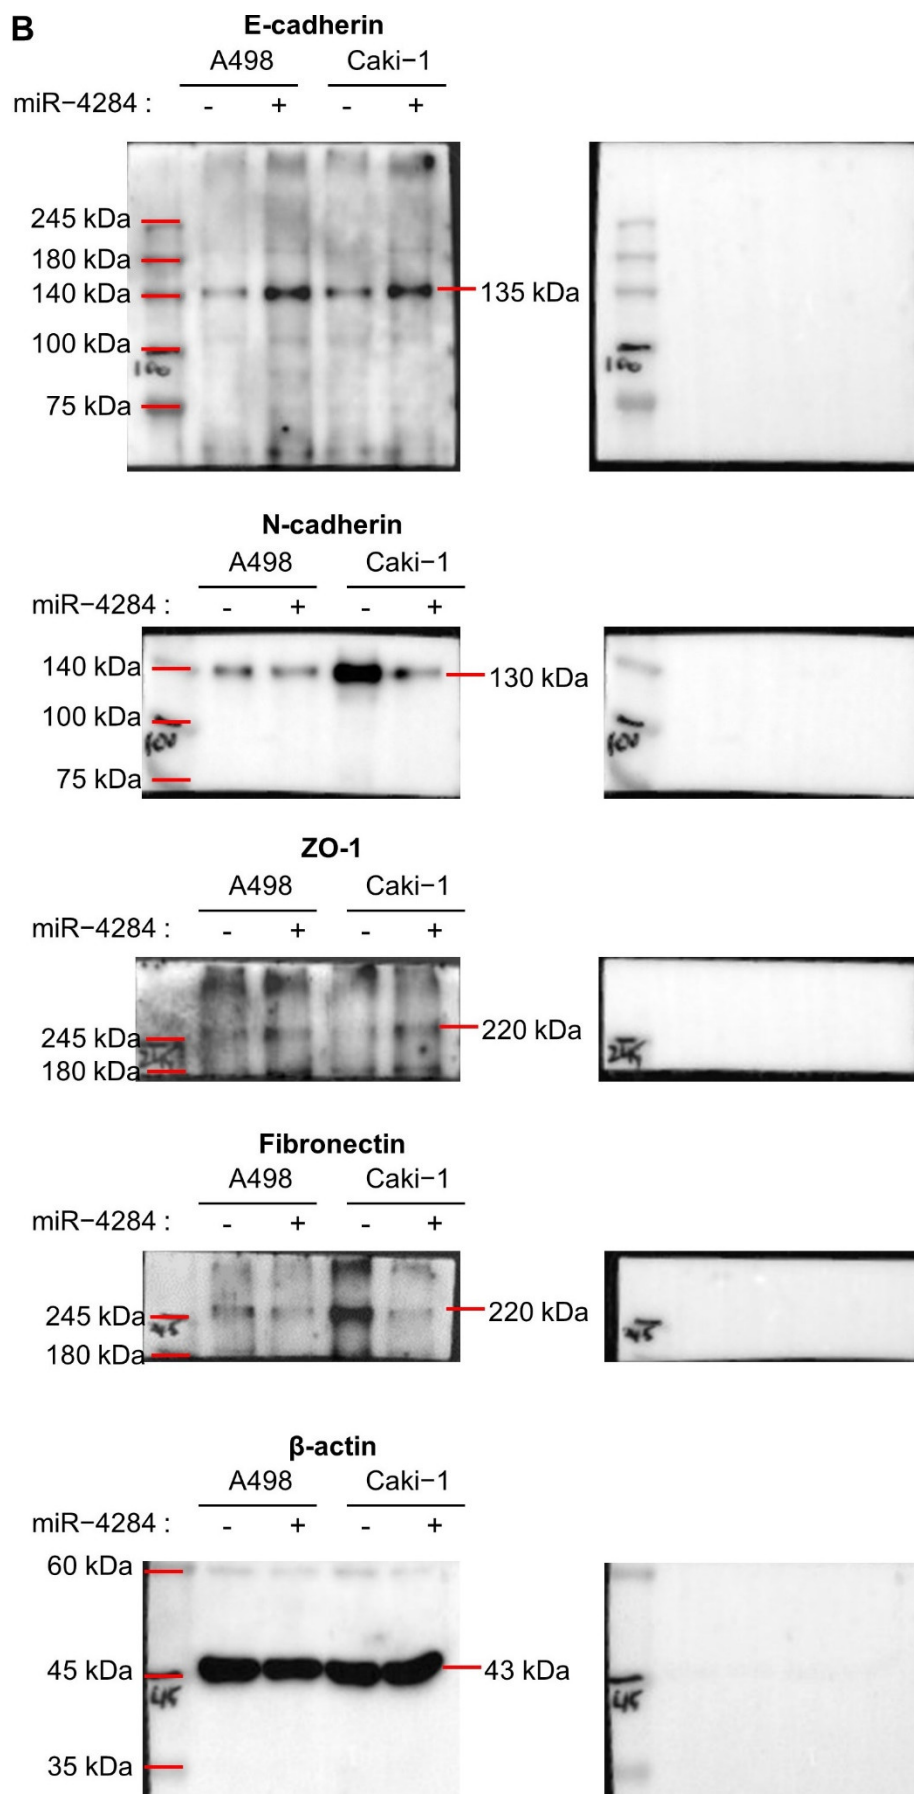

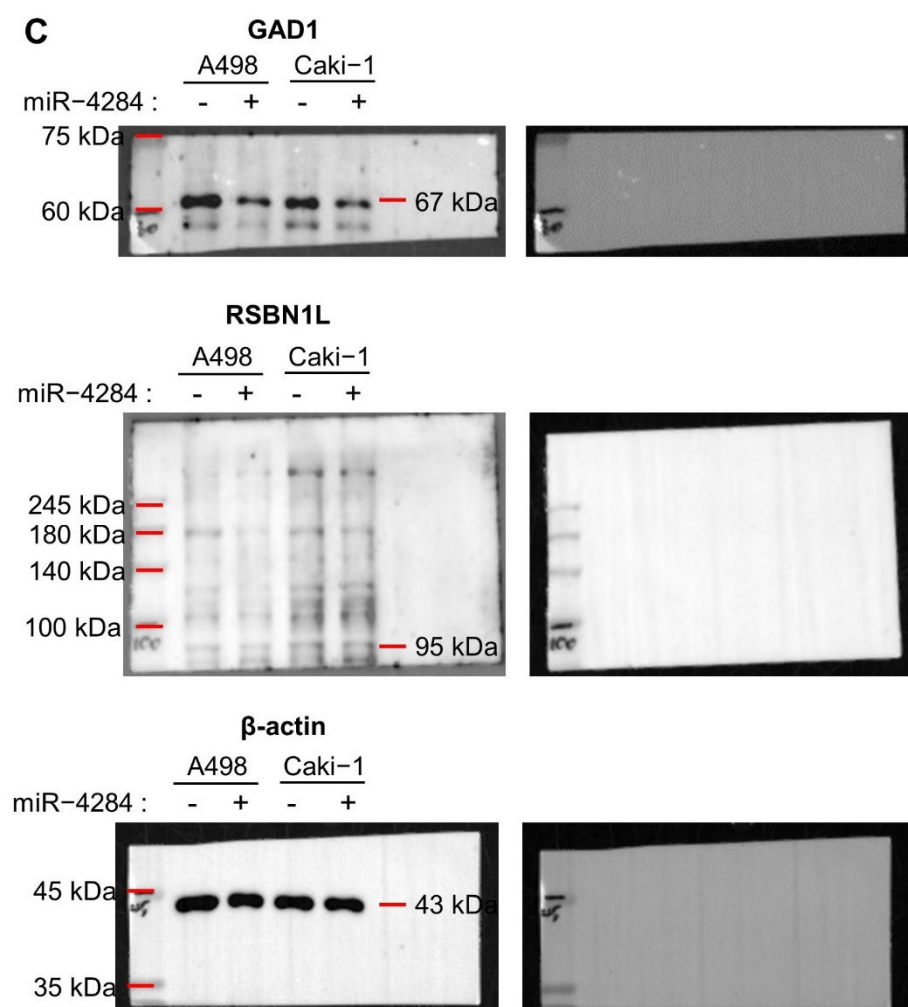

**Supplementary Figure S2.** Western blot of cell lysate in figure. (A) Western blot bands of figure 1G. (B) Western blot bands of figure 2C. (C) Western blot bands of figure 3C.
